# Supplementary material for: Diverse Mechanisms of Antimicrobial Activities of Lactoferrins, Lactoferricins, and Other Lactoferrin-Derived Peptides
Source: MDPI journal article supplement (doi:10.3390/ijms222011264), 2021-10-19
Supplement: s1 [file s1]

**Diverse mechanisms of antimicrobial activities of lactoferrins, lactoferricins, and other lactoferrin-derived peptides**

**Cell and molecular life science**

Špela Gruden, Nataša Poklar Ulrih\*

Department of Food Science and Technology, Biotechnical Faculty, University of Ljubljana, 1000 Ljubljana, Slovenia,

**\*Corresponding author: Nataša Poklar Ulrih**

Department of Food Science and Technology

Biotechnical Faculty

University of Ljubljana

Jamnikarjeva 101

1000 Ljubljana, Slovenia,

Tel: +386-1-3203 780

E-mail: [natasa.poklar@bf.uni-lj.si](mailto:natasa.poklar@bf.uni-lj.si)

**Code availability:** Not applicable.

**Supplementary Table S1.** Studies carried out to date on bacteria, viruses, and fungi that are either susceptible or resistant (designated as R) to antimicrobial activity of lactoferrins, lactoferricins, and lactoferrin-derived (Lf peptide) and lactoferricin-derived (Lf-cin peptide) peptides.

| Species                             | Source of lactoferrins used <sup>1</sup> |            |               |                |          | Peptide fraction <sup>2</sup> | References |
|-------------------------------------|------------------------------------------|------------|---------------|----------------|----------|-------------------------------|------------|
|                                     | Lactoferrin                              | Lf peptide | Lactoferricin | Lf-cin peptide | Lf-ampin |                               |            |
| Gram-positive bacteria              |                                          |            |               |                |          |                               |            |
| <i>Bacillus cereus</i>              |                                          |            | Bovine        |                |          | f(17-41)                      | [100]      |
|                                     |                                          | I: bovine  |               |                |          | f(17-42)                      | [132]      |
| <i>Bacillus circulans</i>           |                                          |            | Bovine        |                |          | f(17-41)                      | [100]      |
| <i>Bacillus natto</i>               |                                          |            | Bovine        |                |          | f(17-41)                      | [100]      |
| <i>Bacillus subtilis</i>            |                                          |            | Bovine        |                |          | f(17-41)                      | [100, 110] |
|                                     |                                          |            |               | 15: bovine     |          | f(17-31)                      | [110, 114] |
|                                     |                                          |            |               | 11: bovine     |          | f(20-30)                      | [110, 112] |
|                                     |                                          |            |               | 9: bovine (R)  |          | f(20-28)                      | [110]      |
|                                     |                                          |            |               | 6: bovine (R)  |          | f(20-25)                      | [114]      |
|                                     |                                          |            |               |                | Bovine   | f(268-284)                    | [139]      |
| <i>Bifidobacterium bifidum</i>      |                                          |            | Bovine (R)    |                |          | f(17-41)                      | [100]      |
| <i>Bifidobacterium adolescentis</i> |                                          |            | Bovine        |                |          | f(17-41)                      | [100]      |
| <i>Bifidobacterium breve</i>        |                                          |            | Bovine        |                |          | f(17-41)                      | [100]      |
| <i>Bifidobacterium longum</i>       |                                          |            | Bovine        |                |          | f(17-41)                      | [100]      |

|                                     |              |                 |                |
|-------------------------------------|--------------|-----------------|----------------|
| <i>Bifidobacterium infantis</i>     | Bovine       | f(17-41)        | [100]          |
| <i>Clostridium perfringens</i>      | Bovine       | f(17-41)        | [100]          |
| <i>Clostridium paraputificum</i>    | Bovine       | f(17-41)        | [100]          |
| <i>Corynebacterium ammoniagenes</i> | Bovine       | f(17-41)        | [100]          |
| <i>Corynebacterium diphtheriae</i>  | Bovine       | f(17-41)        | [100]          |
| <i>Corynebacterium renal</i>        | Bovine       | f(17-41)        | [100]          |
| <i>Enterococcus faecalis</i>        | Bovine (R)   | f(17-41)        | [100]          |
| <i>Lactobacillus casei</i>          | Human (R)    | /               | [71]           |
|                                     | Bovine       | f(17-41)        | [100]          |
| <i>Listeria monocytogenes</i>       | Bovine       | /               | [57, 135]      |
|                                     | Bovine       | f(17-41)        | [57, 100, 230] |
|                                     | I: bovine    | f(17-42)        | [132]          |
|                                     | 21LF: bovine | f(85-109)       | [135]          |
|                                     | 38LF: bovine | f(341-366)      | [135]          |
|                                     | 45LF: bovine | f(282-307)      | [135]          |
| <i>Micrococcus flavus</i>           | Bovine       | /               | [231]          |
|                                     | Caprine      | /               | [231]          |
|                                     | Ovine        | /               | [231]          |
|                                     | Bovine       | f(17-41)        | [231]          |
|                                     | Caprine      | f(14-42)        | [231]          |
|                                     | 2: bovine    | f(1-11)-(17-47) | [133]          |
|                                     | 4: bovine    | f(1-16)-(45-48) | [133]          |
| <i>Staphylococcus aureus</i>        | Bovine       | /               | [57]           |

|                                     |               |            |                         |
|-------------------------------------|---------------|------------|-------------------------|
|                                     | Human (R)     | /          | [71]                    |
|                                     | Bovine        | f(17-41)   | [57, 98, 100, 110, 111] |
|                                     | 15: bovine    | f(17-31)   | [110, 111]              |
|                                     | 11: bovine    | f(20-30)   | [110, 113]              |
|                                     | 9: bovine (R) | f(20-28)   | [110]                   |
|                                     | Human         | f(1-49)    | [98]                    |
|                                     | Caprine       | f(17-41)   | [98, 100]               |
|                                     | Murine        | f(17-41)   | [98]                    |
|                                     | P20: porcine  | f(18-37)   | [99]                    |
|                                     | I: bovine     | f(17-42)   | [132]                   |
| <i>Staphylococcus epidermidis</i>   | Human (R)     | /          | [71]                    |
|                                     | Bovine        | f(17-41)   | [100]                   |
| <i>Staphylococcus haemolyticus</i>  | Bovine        | f(17-41)   | [100]                   |
| <i>Staphylococcus hominus</i>       | Bovine        | f(17-41)   | [100]                   |
| <i>Streptococcus bovis</i>          | Bovine        | f(17-41)   | [100]                   |
| <i>Streptococcus cremoris</i>       | Bovine        | f(17-41)   | [100]                   |
| <i>Streptococcus lactis</i>         | Human (R)     | /          | [71]                    |
|                                     | Bovine        | f(17-41)   | [100]                   |
| <i>Streptococcus (mitior) mitis</i> | Human         | /          | [71]                    |
| <i>Streptococcus mutans</i>         | Human         | /          | [59, 60, 71, 72]        |
|                                     | Human         | f(1-49)    | [100]                   |
|                                     | Bovine        | f(268-284) | [139]                   |

|                                              |                 |                    |                    |
|----------------------------------------------|-----------------|--------------------|--------------------|
|                                              | Chimera: bovine | f(17-30)-(265-284) | [137]              |
| <i>Streptococcus pneumoniae</i>              | Bovine          | /                  | [84]               |
|                                              | Human           | /                  | [71]               |
|                                              | 14: bovine      | f(17-30)           | [84]               |
|                                              | Bovine          | f(268-284)         | [84]               |
|                                              | Chimera: bovine | f(17-30)-(265-284) | [84]               |
| <i>Streptococcus pyogenes</i>                | Human (R)       | /                  | [71]               |
|                                              | Bovine          | /                  | [135]              |
|                                              | 21LF: bovine    | f(85-109)          | [135]              |
|                                              | 38LF: bovine    | f(341-366)         | [135]              |
|                                              | 45LF:bovine     | f(282-307)         | [135]              |
| <i>Streptococcus thermophilus</i>            | Bovine          | f(17-41)           | [100]              |
| <i>Streptococcus salivarius</i>              | Human           | /                  | [71]               |
| <i>Streptococcus sanguis</i>                 | Human           | f(269-285)         | [141]              |
|                                              | Chimera: bovine | f(17-30)-(265-284) | [137]              |
| <b>Gram-negative bacteria</b>                |                 |                    |                    |
| <i>Aggregatibacter actinomycetemcomitans</i> | Human           | /                  | [74]               |
| <i>Bacteroides distasonis</i>                | Bovine          | f(17-41)           | [100]              |
| <i>Bacteroides vulgatus</i>                  | Bovine          | f(17-41)           | [100]              |
| <i>Burkholderia pseudomallei</i>             | Chimera: bovine | f(17-30)-(265-284) | [144]              |
| <i>Escherichia coli</i>                      | Bovine          | /                  | [57, 75, 135, 231] |
|                                              | Human (some R)  | /                  | [60, 64, 71]       |

|               |                 |                                                      |
|---------------|-----------------|------------------------------------------------------|
| Caprine       | /               | [231]                                                |
| Ovine         | /               | [231]                                                |
| Bovine        | f(17-41)        | [57, 58, 61, 98,<br>100, 101, 106, 110,<br>111, 231] |
| 15: bovine    | f(17-31)        | [109-111, 114]                                       |
| B 11: bovine  | f(20-30)        | [110, 112, 113]                                      |
| 9: bovine (R) | f(20-28)        | [110]                                                |
| 6: bovine (R) | f(20-25)        | [109, 110, 114]                                      |
| Human         | f(1-49)         | [98]                                                 |
| 5s: human     | f(21-31)        | [109]                                                |
| 6s: human     | f(19-31)        | [109]                                                |
| Caprine       | f(14-42)        | [98, 231]                                            |
| Murine        | f(17-41)        | [98]                                                 |
| P20: porcine  | f(18-37)        | [99]                                                 |
| I: bovine     | f(17-42)        | [132]                                                |
| II: bovine    | f(1-16)-(43-48) | [132]                                                |
| III: bovine   | f(1-42)-(43-48) | [132]                                                |
| 1A: bovine    | f(17-41)        | [136]                                                |
| 1B: bovine    | f(17-42)        | [136]                                                |
| 2: bovine     | f(17-43)        | [136]                                                |
| 3: bovine     | f(1-16)-(17-48) | [136]                                                |
| 21LF: bovine  | f(85-109)       | [135]                                                |

|                               |                 |                    |                    |
|-------------------------------|-----------------|--------------------|--------------------|
|                               | 38LF: bovine    | f(341-366)         | [135]              |
|                               | 45LF: bovine    | f(282-307)         | [135]              |
|                               | Bovine          | f(268-284)         | [139]              |
|                               | Bovine          | f(259–284)         | [140]              |
|                               | Bovine          | f(265–296)         | [140]              |
|                               | Bovine          | f(265–284)         | [140]              |
|                               | Human (R)       | f(269-285)         | [141]              |
|                               | Chimera: bovine | f(17-30)-(265-284) | [137]              |
| <i>Enterobacter cloacae</i>   | Human (R)       | /                  | [71]               |
| <i>Campylobacter jejuni</i>   | Bovine          | f(17-41)           | [100]              |
| <i>Helicobacter pylori</i>    | Bovine          | /                  | [127]              |
|                               | Human           | /                  | [127]              |
|                               | Bovine          | f(17-41)           | [127]              |
|                               | 14: bovine (R)  | f(17-30)           | [137]              |
|                               | Bovine (R)      | f(269-285)         | [137]              |
|                               | Chimera: bovine | f(17-30)-(265-284) | [137]              |
| <i>Legionella pneumophila</i> | Human           | /                  | [73]               |
| <i>Proteus mirabilis</i>      | B: bovine (R)   | f(17-41)           | [98]               |
| <i>Proteus vulgaris</i>       | Bovine          | f(17-41)           | [100]              |
| <i>Pseudomonas aeruginosa</i> | Bovine (R)      | /                  | [57]               |
|                               | Human           | /                  | [71]               |
|                               | Bovine          | f(17-41)           | [57, 75, 100, 110] |
|                               | 15: bovine      | f(17-31)           | [110]              |

|                                |                 |               |                    |                |
|--------------------------------|-----------------|---------------|--------------------|----------------|
|                                |                 | 11: bovine    | f(20-30)           | [110]          |
|                                |                 | 9: bovine (R) | f(20-28)           | [110]          |
|                                |                 | Bovine        | f(268-284)         | [139]          |
|                                | Chimera: bovine |               | f(17-30)-(265-284) | [137]          |
| <i>Pseudomonas fluorescens</i> |                 | Bovine (R)    | f(17-41)           | [100, 134]     |
|                                |                 | I: bovine     | f(17-42)           | [132]          |
|                                |                 | Bovine (R)    | f(308-317)         | [134]          |
| <i>Pseudomonas putida</i>      | Bovine          |               | /                  | [75]           |
| <i>Pseudomonas syringae</i>    |                 | Bovine        | f(17-41)           | [134]          |
|                                |                 | Bovine        | f(308-317)         | [134]          |
| <i>Salmonella choleraesuis</i> |                 | Bovine        | f(17-41)           | [110]          |
|                                |                 | 15: bovine    | f(17-31)           | [110]          |
|                                |                 | 11: bovine    | f(20-30)           | [110]          |
|                                |                 | 9: bovine (R) | f(20-28)           | [110]          |
| <i>Salmonella enteritidis</i>  |                 | Bovine        | f(17-41)           | [100]          |
| <i>Salmonella montevideo</i>   |                 | Bovine        | f(17-41)           | [61]           |
| <i>Salmonella newport</i>      | Human (R)       |               | /                  | [71]           |
| <i>Salmonella salford</i>      |                 | I: bovine     | f(17-42)           | [132]          |
| <i>Salmonella typhimurium</i>  | Human           |               | /                  | [64]           |
|                                |                 | Bovine        | f(17-41)           | [61, 106, 110] |
|                                |                 | 15: bovine    | f(17-31)           | [110]          |
|                                |                 | 11: bovine    | f(20-30)           | [110]          |
|                                |                 | 9: bovine (R) | f(20-28)           | [110]          |



|                                    |                 |                    |              |
|------------------------------------|-----------------|--------------------|--------------|
| <i>Shigella sonnei</i>             | Human (R)       | /                  | [71]         |
| <i>Shigella flexneri</i>           | Bovine          | f(17-41)           | [106]        |
| <i>Klebsiella pneumoniae</i>       | Bovine (R)      | /                  | [57]         |
|                                    | Bovine          | f(17-41)           | [57, 100]    |
| <i>Vibrio cholerae</i>             | Bovine          | /                  | [142, 232]   |
|                                    | Human           | /                  | [60, 64, 71] |
|                                    | 14: bovine (R)  | f(17-30)           | [142]        |
|                                    | Bovine (R)      | f(265-284)         | [142]        |
|                                    | Chimera: bovine | f(17-30)-(265-284) | [142]        |
| <i>Vibrio parahaemolyticus</i>     | Bovine          | /                  | [142]        |
|                                    | 14: bovine (R)  | f(17-30)           | [142]        |
|                                    | Bovine (R)      | f(265-284)         | [142]        |
|                                    | Chimera: bovine | f(17-30)-(265-284) | [142]        |
| <i>Yersinia enterocolitica</i>     | Bovine          | /                  | [135]        |
|                                    | Bovine (some R) | f(17-41)           | [98, 100]    |
|                                    | 21LF: bovine    | f(85-109)          | [135]        |
|                                    | 38LF: bovine    | f(341-366)         | [135]        |
|                                    | 45 LF: bovine   | f(282-307)         | [135]        |
|                                    | 14: bovine      | f(17-30)           | [143]        |
|                                    | Bovine          | f(265-284)         | [143]        |
|                                    | Chimera: bovine | f(17-30)-(265-284) | [143]        |
|                                    | 14: bovine (R)  | f(17-30)           | [143]        |
| <i>Yersinia pseudotuberculosis</i> | Bovine (R)      | f(265-284)         | [143]        |
|                                    |                 |                    |              |

|                          |                 |                    |                           |
|--------------------------|-----------------|--------------------|---------------------------|
|                          | Chimera: bovine | f(17-30)-(265-284) | [143]                     |
| <b>Enveloped viruses</b> |                 |                    |                           |
| Coronavirus              |                 |                    |                           |
| SARS CoV (pseudovirus)   | Bovine          | /                  | [189]                     |
| SARS CoV 2               | Human           | /                  | [193, 194]                |
|                          | Bovine          | /                  | [191-193]                 |
| Feline calicivirus       | Bovine          | /                  | [171]                     |
|                          | Bovine          | f(17-41)           | [171]                     |
| Hantavirus               | Bovine          | /                  | [233]                     |
| Hepatitis B virus        | Bovine          | /                  | [151]                     |
|                          | Human           | /                  |                           |
| Hepatitis C virus        | Bovine          | /                  | [150, 234, 235]           |
|                          | Human           | /                  | [150, 235]                |
|                          | Bovine (R)      | f(17-41)           | [234]                     |
|                          | Bovine          | f(600-632)         | [180]                     |
| Hepatitis G virus        | Bovine          | /                  | [234]                     |
| Herpes simplex virus-1   | Bovine          | /                  | [146, 152, 154, 155, 173] |
|                          | Human           | /                  | [146, 152, 154, 155]      |
|                          | Caprine         | /                  | [146]                     |
|                          | Bovine          | f(17-41)           | [146, 152]                |

|                                         |            |              |                 |
|-----------------------------------------|------------|--------------|-----------------|
|                                         | Human      | f(1-49)      | [146]           |
|                                         | 19: bovine | f(86-258)    | [182]           |
|                                         | 28: bovine | f(345-689)   | [182]           |
|                                         | 30: bovine | f(1-280)     | [182]           |
| Herpes simplex virus-2                  | Bovine     | /            | [146, 236]      |
|                                         | Human      | /            | [146]           |
|                                         | Caprine    | /            | [146]           |
|                                         | Bovine     | f(17-41)     | [146]           |
|                                         | Human      | f(1-49)      | [146]           |
| Human cytomegalovirus                   | Bovine     | /            | [154, 158, 159] |
|                                         | Human      | /            | [154, 158, 159] |
|                                         | Caprine    | /            | [158]           |
|                                         | Human      | f(1-49)      | [158]           |
| Human immunodeficiency virus,<br>type 1 | Bovine     | /            | [159-162]       |
|                                         | Human      | /            | [159, 162]      |
|                                         | Bovine     | f(17-41)     | [160, 185]      |
| Human immunodeficiency virus,<br>type 2 | Bovine     | /            | [162]           |
| Influenza virus A (H1N1; H3N2)          | Bovine     | /            | [147, 149]      |
|                                         | 1: bovine  | f(418-429)   | [149]           |
|                                         | 2: bovine  | f(506-522)   | [149]           |
|                                         | 3: bovine  | f(552-563) * | [149]           |

|                             |        |            |            |            |
|-----------------------------|--------|------------|------------|------------|
|                             |        | 14: bovine | f(426-429) | [178]      |
|                             |        | 15: bovine | f(422-425) | [178]      |
|                             |        | 17: bovine | f(418-421) | [178]      |
| Respiratory syncytial virus | Human  |            | /          | [237]      |
| <b>Naked viruses</b>        |        |            |            |            |
| Adenovirus                  | Bovine |            | /          | [163-165]  |
|                             | Human  |            | /          | [163, 164] |
|                             |        | Bovine     | f(17-41)   | [164]      |
| Echovirus                   | Bovine |            | /          | [148, 169] |
|                             |        | Bovine     | f(17-41)   | [148]      |
| Enterovirus 71              | Bovine |            | /          | [238]      |
|                             | Human  |            | /          | [238]      |
| Human papillomavirus        | Bovine |            | /          | [166, 167] |
|                             | Human  |            | /          | [166, 167] |
|                             |        | 15: bovine | f(17-31)   | [167]      |
|                             |        | 16: bovine | f(17-42)   | [167]      |
|                             |        | Human      | f(1-49)    | [167]      |
|                             |        |            |            |            |
| Rotavirus                   | Bovine |            | /          | [170, 198] |
|                             |        | Bovine     | f(86-258)  | [198]      |
|                             |        | Bovine     | f(324-329) | [198]      |
| Poliovirus                  | Bovine |            | /          | [168, 171] |
|                             |        | Bovine (R) | f(17-41)   | [171]      |
| <b>Yeast</b>                |        |            |            |            |

|                               |                 |            |                    |
|-------------------------------|-----------------|------------|--------------------|
| <i>Candida albicans</i>       | Bovine          | /          | [135]              |
|                               | Human           | /          | [71, 199, 200]     |
|                               | Bovine          | f(17-41)   | [98, 139, 202-204] |
|                               | 14: bovine      | f(17-30)   | [139]              |
|                               | 15: bovine      | f(17-31)   | [114]              |
|                               | 6: bovine       | f(20-25)   | [114]              |
|                               | 2: bovine       | f(17-26)   | [205]              |
|                               | P20: porcine    | f(18-37)   | [99]               |
|                               | 21LF: bovine    | f(85-109)  | [135]              |
|                               | 38LF: bovine    | f(341-366) | [135]              |
|                               | 45LF: bovine    | f(282-307) | [135]              |
|                               | Bovine          | f(268-284) | [139]              |
|                               | Bovine          | f(259-284) | [140]              |
|                               | Bovine          | f(265-296) | [140]              |
|                               | Bovine          | f(265-284) | [140]              |
|                               | Human (R)       | f(269-285) | [141]              |
| <i>Candida glabrata</i>       | Bovine (some R) | f(17-41)   | [203]              |
| <i>Candida guilliermondii</i> | Bovine          | f(17-41)   | [203]              |
| <i>Candida kefyr</i>          | Bovine          | f(17-41)   | [203]              |
| <i>Candida krusei</i>         | Human           | /          | [200]              |
|                               | Bovine          | f(17-41)   | [203]              |
| <i>Candida parapsilosis</i>   | Bovine          | f(17-41)   | [203]              |
| <i>Candida tropicalis</i>     | Bovine          | f(17-41)   | [98, 203]          |

|                                   |                 |          |            |
|-----------------------------------|-----------------|----------|------------|
| <i>Cryptococcus albidus</i>       | Bovine          | f(17-41) | [204]      |
| <i>Cryptococcus curvatus</i>      | Bovine          | f(17-41) | [204]      |
| <i>Cryptococcus neoformans</i>    | Bovine          | f(17-41) | [98, 203]  |
| <i>Cryptococcus uniguttulatus</i> | Bovine          | f(17-41) | [204]      |
| <i>Saccharomyces cerevisiae</i>   | Bovine          | f(17-41) | [203]      |
|                                   | 15: bovine      | f(17-31) | [114]      |
|                                   | 6: bovine (R)   | f(20-25) | [114]      |
| <i>Trichosporon cutaneum</i>      | Bovine          | f(17-41) | [203, 204] |
| <b>Filamentous fungi</b>          |                 |          |            |
| <i>Absidia corymbifera</i>        | Bovine (some R) | f(17-41) | [203]      |
| <i>Aspergillus clavatus</i>       | Bovine (R)      | f(17-41) | [203]      |
| <i>Aspergillus flavus</i>         | Bovine          | f(17-41) | [203]      |
| <i>Aspergillus fumigatus</i>      | Bovine (some R) | f(17-41) | [203, 204] |
| <i>Aspergillus nidulans</i>       | 15: bovine      | f(17-31) | [114]      |
|                                   | 6: bovine       | f(20-25) | [114]      |
| <i>Aspergillus niger</i>          | Bovine (some R) | f(17-41) | [203, 204] |
| <i>Aspergillus versicolor</i>     | Bovine          | f(17-41) | [203]      |
| <i>Botrytis cinerea</i>           | 15:bovine       | f(17-31) | [114]      |
|                                   | 6: bovine       | f(20-25) | [114]      |
| <i>Cladosporium trichoides</i>    | Bovine          | f(17-41) | [203]      |
| <i>Epidermophyton floccosum</i>   | Bovine          | f(17-41) | [203]      |
| <i>Exophiala dermatitidis</i>     | Bovine          | f(17-41) | [203]      |
| <i>Fonsecaea pedrosoi</i>         | Bovine          | f(17-41) | [203]      |

|                                      |                |          |       |
|--------------------------------------|----------------|----------|-------|
| <i>Fusarium moniliforme</i>          | Bovine         | f(17-41) | [203] |
| <i>Fusarium oxysporum</i>            | 15: bovine     | f(17-31) | [114] |
|                                      | 6: bovine      | f(20-25) | [114] |
| <i>Magnaporthe grisea</i>            | 15: bovine (R) | f(17-31) | [114] |
|                                      | 6: bovine (R)  | f(20-25) | [114] |
| <i>Microsporum canis</i>             | Bovine         | f(17-41) | [203] |
| <i>Microsporum gypseum</i>           | Bovine         | f(17-41) | [203] |
| <i>Mucor circinelloides</i>          | Bovine (R)     | f(17-41) | [203] |
| <i>Mucor racemosus</i>               | Bovine         | f(17-41) | [203] |
| <i>Nannizzia gypsea</i>              | Bovine         | f(17-41) | [204] |
| <i>Nannizzia incurvata</i>           | Bovine         | f(17-41) | [204] |
| <i>Nannizzia otae</i>                | Bovine         | f(17-41) | [204] |
| <i>Paracoccidioides brasiliensis</i> | Bovine         | f(17-41) | [203] |
| <i>Penicillium digitatum</i>         | Bovine         | f(17-31) | [114] |
|                                      | Bovine         | f(20-25) | [114] |
| <i>Penicillium expansum</i>          | Bovine (R)     | f(17-41) | [203] |
|                                      | 15: bovine     | f(17-31) | [114] |
|                                      | 6: bovine      | f(20-25) | [114] |
| <i>Penicillium italicum</i>          | 15: bovine     | f(17-31) | [114] |
|                                      | 6: bovine      | f(20-25) | [114] |
| <i>Penicillium notatum</i>           | Bovine (R)     | f(17-41) | [203] |
| <i>Penicillium pinophilum</i>        | Bovine         | f(17-41) | [204] |
| <i>Penicillium vermiculatum</i>      | Bovine         | f(17-41) | [204] |

|                                    |                 |                 |        |                    |                 |
|------------------------------------|-----------------|-----------------|--------|--------------------|-----------------|
| <i>Phialophora verrucosa</i>       |                 | Bovine          |        | f(17-41)           | [203]           |
| <i>Rhizopus oryzae</i>             |                 | Bovine (R)      |        | f(17-41)           | [203, 204]      |
| <i>Sporothrix schenckii</i>        |                 | Bovine          |        | f(17-41)           | [203]           |
| <i>Trichophyton mentagrophytes</i> |                 | Bovine (some R) |        | f(17-41)           | [203, 204]      |
| <i>Trichophyton rubrum</i>         |                 | Bovine          |        | f(17-41)           | [203, 204]      |
| <i>Trichophyton tonsurans</i>      |                 | Bovine          |        | f(17-41)           | [203]           |
| <i>Trichophyton shoenleinii</i>    |                 | Bovine (R)      |        | f(17-41)           | [203]           |
| <i>Trichophyton violaceum</i>      |                 | Bovine (some R) |        | f(17-41)           | [203]           |
| <b>Parasites</b>                   |                 |                 |        |                    |                 |
| <i>Babesia caballi</i>             | Bovine          |                 |        | /                  | [208]           |
| <i>Giardia intestinalis</i>        | Bovine          |                 |        | /                  | [212]           |
|                                    |                 | Bovine          |        | f(17-41)           | [212]           |
|                                    |                 |                 | Bovine | f(268-284)         | [212]           |
|                                    | Chimera: bovine |                 |        | f(17-30)-(265-284) | [212]           |
| <i>Giardia lamblia</i>             | Bovine          |                 |        | /                  | [210, 211, 213] |
|                                    |                 | Bovine          |        | f(17-41)           | [210, 211, 213] |
|                                    |                 |                 |        |                    |                 |
| <i>Toxsoplasma gondii</i>          | Bovine (R)      |                 |        | /                  | [225, 226]      |
|                                    |                 | Bovine          |        | f(17-41)           | [225, 228, 229] |
|                                    |                 |                 |        |                    |                 |
|                                    |                 |                 |        |                    |                 |



---

<sup>1</sup> Lactoferrin-derived peptides are named as in original articles; <sup>2</sup>sequence of peptide fraction correspond to the sequence of the source lactoferrin

\*Due to the poor stability of the TNGESTADWAKN f(552-563) peptide, a modified sequence (NGESSADWAKN) was designed where the first threonine was removed and the other one was replaced by serine.
